# Supplementary material for: The Diagnostic Value of PI-RADS v2.1 in Patients with a History of Transurethral Resection of the Prostate (TURP)
Source: MDPI journal article supplement (doi:10.3390/curroncol29090502), 2022-09-05
Supplement: s1 [file s1]

*Supplementary Material*

# The Diagnostic Value of PI-RADS v2.1 in Patients with a History of Transurethral Resection of the Prostate (TURP)

Jiazhou Liu <sup>1,†</sup>, Shihang Pan <sup>2,†</sup>, Liang Dong <sup>1,†</sup>, Guangyu Wu <sup>2</sup>, Jiayi Wang <sup>1</sup>, Yan Wang <sup>1</sup>, Hongyang Qian <sup>1</sup>, Baijun Dong <sup>1</sup>, Jiahua Pan <sup>1</sup>, Yinjie Zhu <sup>1,\*</sup> and Wei Xue <sup>1,\*</sup>

<sup>1</sup> Department of Urology, Ren Ji Hospital, Shanghai Jiao Tong University School of Medicine, Shanghai 200127, China

<sup>2</sup> Department of Imaging, Ren Ji Hospital, Shanghai Jiao Tong University School of Medicine, Shanghai 200127, China

\* Correspondence: zhuyinjie@renji.com (Y.Z.); xuwei@renji.com (W.X.); Tel.: +86-21-68383757 (Y.Z. & W.X.); Fax: +86-21-58394262 (Y.Z. & W.X.)

† These authors equally contribute to the study.

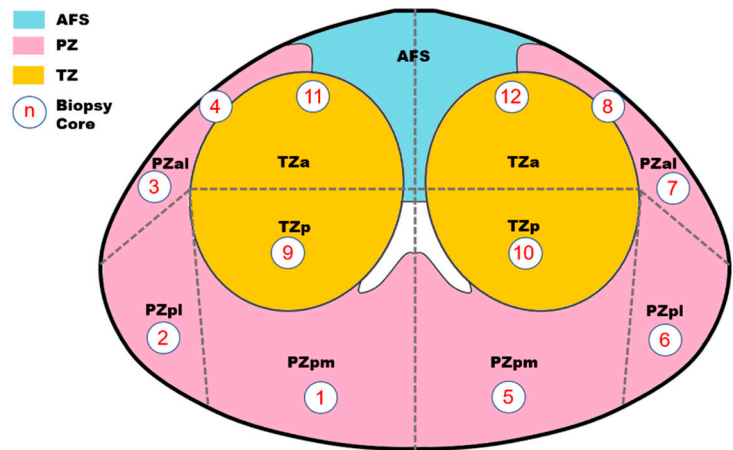

**Figure S1.** 12-core transrectal ultrasound (TRUS)-guided transperineal prostate biopsy template. Transverse view of prostate gland. 12 biopsy cores distribute bilaterally to cover the peripheral zone and transitional zone. AFS: anterior fibromuscular stroma; TZa: anterior transitional zone; TZp: posterior transitional zone; PZal: anterior lateral peripheral zone; PZpl: posterior lateral peripheral zone; PZpm: posterior medial peripheral zone.

**Table S1.** Univariate and multivariate logistic regression analysis for CSPCa.

| Variables    | Categories        | Univariate Analysis    |                | Multivariate Analysis  |                |
|--------------|-------------------|------------------------|----------------|------------------------|----------------|
|              |                   | OR (95%CI)             | <i>p</i> Value | OR (95%CI)             | <i>p</i> Value |
| Age          | continuous        | 1.144 (1.061–1.234)    | 0.000          | 1.116 (1.017–1.225)    | 0.020          |
| PSA          | continuous        | 1.070 (1.025–1.118)    | 0.002          | 1.043 (0.998–1.091)    | 0.061          |
| F/T PSA      | <0.135 vs. ≥0.135 | 7.578 (3.120–18.405)   | 0.000          | 8.158 (2.783–23.912)   | 0.000          |
| PI-RADS V2.1 | ≥3 vs. <3         | 14.318 (1.810–113.234) | 0.000          | 13.070 (1.462–116.823) | 0.021          |

**Table S2.** Logistic regression analysis of PI-RADS v2.1 in the peripheral zone and transitional zone.

| Peripheral Zone      |                        |                |
|----------------------|------------------------|----------------|
| PI-RADS v2.1 PZ      | OR (95%CI)             | <i>p</i> Value |
| 2                    | 1 (Reference)          |                |
| 3                    | 1.714 (0.369–7.954)    | 0.491          |
| 4                    | 7.200 (2.140–24.230)   | 0.001          |
| 5                    | 30.000 (4.714–190.939) | 0.000          |
| ≥3 vs. <3            | 6.333 (2.000–20.052)   | 0.002          |
| Transitional Zone    |                        |                |
| PI-RADS v2.1 TZ      | OR (95%CI)             | <i>p</i> Value |
| No Suspected Lesions | 1 (Reference)          |                |
| 2                    | 0.674 (0.212–2.142)    | 0.503          |
| 3                    | 0.477 (0.155–1.474)    | 0.199          |
| 4                    | 2.455 (0.564–10.684)   | 0.231          |
| 5                    | 0.234 (0.025–2.164)    | 0.201          |
| ≥3 vs. <3            | 0.778 (0.335–1.803)    | 0.558          |
